# Supplementary material
Source: PubMed Central journal article supplement (PMC6456410)
Supplement: NIHMS1521863-supplement-1.pdf [file NIHMS1521863-supplement-1.pdf]

**Supplemental Table I.** Sequences of DNA primers and probes for *Stat1* gene targeting and real-time qPCR assays.

| Target                                        |   | Sequence                                                                               |
|-----------------------------------------------|---|----------------------------------------------------------------------------------------|
| <i>Stat1</i> exon 10, 11 and 12 left arm      | F | 5'-ATTGTCCCAGCATTGCCAGCTAGGAACTG-3'                                                    |
|                                               | R | 5'-GTCGACCAGAGATGCATCAAGACATCAAAC-3'                                                   |
| <i>Stat1</i> upstream exon 10 + loxP left arm | F | 5'-GCGCGCGGCTAGCCAAGTTTATGCTC-3'                                                       |
|                                               | R | 5'-GGCCGCGCGGCCGCATAACTTCGTATAGCATACATTATACGAAGTT-ACTAACATTAAGCTCTAACAGAACACAGCACTG-3' |
| <i>Stat1</i> downstream exon 12 right arm     | F | 5'-CTCGAGTTTGGAAAGTCTTATAGGATTGACCC-3'                                                 |
|                                               | R | 5'-GGCCGCTGCTAGACCTAGAAGGTGACAAAGAC-3'                                                 |
| SeV-NP                                        | F | 5'-GGCGGTGGTGCAATTGAG-3'                                                               |
|                                               | R | 5'-CATGAGCTTCTGTTTCTAGGTGAT-3'                                                         |
|                                               | P | 5'-AGCTCTAGACAATGCC-3'                                                                 |
| EV-D68-VP1                                    | F | 5'-CAGCAGAGGCAGCCTACCA-3'                                                              |
|                                               | R | 5'-TCACAGTGTGCGTTGCTGTT-3'                                                             |
|                                               | P | 5'-ATTGAGAGCATCATCA-3'                                                                 |
| Mouse <i>Muc5ac</i>                           | F | 5'-TACCACTCCCTGCTTCTGCAGCGTGTCA-3'                                                     |
|                                               | R | 5'-ATAGTAACAGTGGCCATCAAGGTCTGTCT-3'                                                    |
|                                               | P | 5'-TATACCCCTTGGGATCCATCATCTACA-3'                                                      |

Abbreviations: F, forward primer; R, reverse primer; P, MGB probe.
